# Supplementary material
Source: publisher figshare collection journal article supplement (https://karger.figshare.com/ndownloader/files/22859429)
Supplement: Supplementary file 1 [file 22859429]

**Supplemental table 1. Association between PPI/H2RA use and dichotomized slope of T-score**

|  | Unadjusted | Adjusted |
| --- | --- | --- |
| Decreasing slope of hip T-score |  |  |
| PPI users (n=1453) | 1.2 (0.9, 1.7) | 1.3 (0.8, 1.9) |
| H2RA users (n=287) | 1.0 (Ref) | 1.0 (Ref) |
| Decreasing slope of spine T-score |  |  |
| PPI users (n=656) | 0.98 (0.7,1.4) | 1.2 (0.8, 1.8) |
| H2RA users (n=222) | 1.0 (Ref) | 1.0 (Ref) |

Multivariable linear regression adjusted for age at transplantation, sex, race, live donor transplantation, transplantation year, BMI, preemptive transplant, duration of dialysis before transplant, cause of ESKD, diagnosis of cardiovascular disease, diabetes, and rheumatologic disorder, smoking, acute rejection, delayed graft function, PRA, induction and maintenance immunosuppressant, interval between transplantation and initial BMD measurement date, use of corticosteroids, bisphosphonate, vitamin D and calcium supplement, serum albumin, calcium, phosphorus, magnesium, iPTH and ALP level.

**Supplemental Table 2. Association between PPI use at 3 months after transplantation (compared to H2RA use) and slope of T-score stratified by age and sex.**

|  | Unadjusted | Adjusted |
| --- | --- | --- |
| Hip T-score |  |  |
| <60 years old |  |  |
| PPI users (n=1077) | 0.0025 (-0.0024, 0.0074) | 0.0012 (-0.0066, 0.0043) |
| ≥60 years old |  |  |
| PPI users (n=401) | 0.0074 (-0.0020, 0.017) | 0.0066 (-0.0038, 0.017) |
| Female |  |  |
| PPI users (n=652) | 0.010 (-0.0029, 0.018) | 0.0040 (-0.0042, 0.012) |
| Male |  |  |
| PPI users (n=826) | 0.0063 (-0.0045, 0.0058) | -0.0014 (-0.0074, 0.0045) |
| Spine T-score |  |  |
| <60 years old |  |  |
| PPI users (n=1077) | -0.0011 (-0.022, 0.020) | -0.013 (-0.039, 0.013) |
| ≥60 years old |  |  |
| PPI users (n=401) | 0.020 (-0.040, 0.079) | 0.037 (-0.035, 0.11) |
| Female |  |  |
| PPI users (n=652) | 0.014 (-0.021, 0.048) | -0.0036 (-0.047, 0.040) |
| Male |  |  |
| PPI users (n=826) | -0.0030 (-0.028, 0.022) | -0.0079 (-0.039, 0.023) |

Multivariable linear regression adjusted for age at transplantation, sex, race, live donor transplantation, transplantation year, BMI, preemptive transplant, duration of dialysis before transplant, cause of ESKD, diagnosis of cardiovascular disease, diabetes, and rheumatologic disorder, smoking, acute rejection, delayed graft function, PRA, induction and maintenance immunosuppressant, interval between transplantation and initial BMD measurement date, use of corticosteroids, bisphosphonate, vitamin D and calcium supplement, serum albumin, calcium, phosphorus, magnesium, iPTH and ALP level.
